# Supplementary material for: Brand transgressions: How, when, and why home country bias backfires
Source: Springer Nature journal article supplement (doi:10.1007/s11747-024-01018-9), 2024-03-28
Supplement: MOESM1 [file 26919998]

**WEB APPENDIX**

**Table S1** Summary of past research on brand transgressions and consumer responses

|  |  | **Gap 1** | **Gap 2** | **Gap 3** | **Gap 4** |  |
| --- | --- | --- | --- | --- | --- | --- |
| **Source** | **Aim of the research** | **Cross-national variability of the transgression** | **Proposed**  **mechanism** | **Moderators (company or consumer related)** | **Multimethod and longitudinal approach** | **Dependent**  **variable** |
| Aaker et al., 2004 | The authors investigate the evolution of relationships between consumers and an on-line photography brand in response to brand personality (sincere vs. exciting) and transgression manipulations | N | Quality of the brand as a relationship partner | Brand personality (sincere vs. exciting) | N | Brand commitment Brand intimacy Brand satisfaction Self-connection with the brand |
| Tsarenko & Tojib, 2015 | The authors examine the interplay between the severity of a brand transgression, consumers’ prior awareness of the firm’s corporate social responsibility (CSR) initiatives, and the firm’s response (apology vs. apologia) on the rates of forgiveness among consumers. | N | Consumer forgiveness (measured) | Firm response: apologia vs. apology (manipulated) Consumer' CSR awareness (measured) | N | Repurchase intentions |
| Chung & Beverland, 2006 | The authors explore whether and how consumers forgive firms for transgressions that befall their shared relationship | N | Service recovery, re-evaluations of trustworthiness, blame, and reinterpretations of brand stereotypes | - | N | Consumer forgiveness |
| Dutta & Pullig, 2011 | The authors investigate the efficacy of three major response strategies to brand transgressions (denial, reduction-of-offensiveness and corrective action) in restoring post-crisis brand confidence and consumer attitudes. | N | - | Domain of the negative brand actions: value vs. performance transgressions | N | Perceived functional, psychological, and social risk Brand attitude Brand consideration |

|  |  | **Gap 1** | **Gap 2** | **Gap 3** | **Gap 4** |  |
| --- | --- | --- | --- | --- | --- | --- |
| **Source** | **Aim of the research** | **Cross-national variability of the transgression** | **Proposed**  **mechanism** | **Moderators (company or consumer related)** | **Multimethod and longitudinal approach** | **Dependent**  **variable** |
| Trump, 2014 | The author investigates consumer forgiveness of brand transgressions if the brand's actions are personally relevant to them or if the negative actions are of an ethical nature rather than related to product performance. | N | - | Domain of the transgression: moral vs. performance transgressions Consumer-brand connection | N | Brand evaluations |
| Thomas & Fowler, 2016 | The authors investigate the role of spokescharacters in defending consumer perceptions after corporate transgressions | N | - | Alignment between the spokescharacter personality and negative information | N | Brand trust Brant attitudes Willingness to pay a price premium |
| Sinha & Lu, 2016 | The authors investigate how consumers react when they have close relationships with a brand that they perceive to be at fault. | N | Forgiving (justice concern vs. expectancy for long-term relationship) | Self-construal: independent vs. interdependent | N | Consumer forgiveness intentions Spread negative word-of-mouth intentions |
| Kuchmaner et al., 2019 | The authors investigate how consumer-to-consumer influence within virtual brand communities plays a role when brands engage in transgressions. | N | Psychological ownership | Perceived network density | N | Likelihood to punish the brand Likelihood to help the brand |
| Klein & Dawar, 2004 | The authors investigate the possibility that the CSR halo affects consumers' attributions in a product–harm crisis situation. | N | Blame Brand evolutions | CSR present vs. absent | N | Buying intentions |
| Dawar & Lei, 2009 | The authors conceptualize brand crises as well-publicized instances of claims that a key brand proposition is unsubstantiated or false, and investigate the effects of brand crises on consumer cognitions and behavior | N | Brand crisis seriousness | Brand familiarity | N | Brand evaluations |

|  |  | **Gap 1** | **Gap 2** | **Gap 3** | **Gap 4** |  |
| --- | --- | --- | --- | --- | --- | --- |
| **Source** | **Aim of the research** | **Cross-national variability of the transgression** | **Proposed**  **mechanism** | **Moderators (company or consumer related)** | **Multimethod and longitudinal approach** | **Dependent**  **variable** |
| Ahluwalia et al., 2000 | The authors investigate how consumers process negative information in the marketplace | N | Perceived diagnosticity of the negative information | Commitment of the consumer toward the brand: high vs. low commitment | N | Attitude towards the brand change (before vs. after) |
| Magnusson et al., 2014 | The authors investigate whether the product-level beliefs can influence product-level beliefs, examining shifts in consumer attitudes toward a country as result of a brand transgression. | N | Country image (macro vs. micro) | Degree of Prototypicality  Country Development (Advanced vs. NIC) | N | Attitude Toward Same-Country Brands (Same Product Category vs. Other Product Categories) |
| Ryoo, 2022 | To extend knowledge about how consumers react when a brand has been reputed for acting morally and then inconsistently transgresses moral guidelines, specifically regarding observers' licensing effects on consumer-brand relationships. | N | Perceived unethicality of transgression | self-brand connection Ambiguity of transgression (ambiguous vs. Blatant) Self affirmation | N | Permissibility of transgression |
| Septianto & Kwon, 2022 | To investigate how having a cute brand logo may reduce consumer punishment of a transgressing brand. The study explores the cognitive processes underlying the cuteness effect by building on prior research on the malleability of human characteristics | N | Motivations to protect the transgressing brand from harm | Repeated transgressions | N | Consumer punishment |
| Aw & Labrecque, 2023 | The authors investigated the role of celebrity endorsers in brand transgression contexts and how they influence consumers' reactions toward an endorsed brand following a transgression. | N | Brand self-congruity | Transgression Controllability (controllable vs. non-controllable) | N | Post-transgression reaction: Forgiveness trust |

|  |  | **Gap 1** | **Gap 2** | **Gap 3** | **Gap 4** |  |
| --- | --- | --- | --- | --- | --- | --- |
| **Source** | **Aim of the research** | **Cross-national variability of the transgression** | **Proposed**  **mechanism** | **Moderators (company or consumer related)** | **Multimethod and longitudinal approach** | **Dependent**  **variable** |
| Kim et al., 2019 | To investigate the interactive effects of brand biography and brand transgression type on consumers' forgiveness intention. The study examines how consumers' high identification with underdog brands affects their forgiveness intention in different transgression types. | N | Perceived anger | Brand transgression (relational vs. non-relational) | N | Forgiveness intention |
| Sohn & Lariscy, 2015 | To cast light on the role of corporate ability and CSR on valence of reputation during different company crisis situations. | N | - | Corporate ability vs. CSR reputational cues  Time point of exposure to crisis information | N | Consumer overall attitudes  Consumer satisfaction  Trust  Commitment  Loyalty |
| Grégoire et al., 2009 | To explore the role of time and relationship strength on consumer revenge and avoidance in online public complaining contexts. | N | Perceived betrayal | Consumer-brand relationship strength  Apology vs compensation strategy | Y | Desire for revenge  Desire for avoidance |
| **Present study** | **To investigate (1) how, when, and why brand origin affects consumer responses to brand transgressions, (2) differences in the managerial impact and post-transgression recovery across domestic and foreign markets, (3) managerial interventions that alleviate transgressions’ impact at home and abroad.** | **Y** | **Social identity threat** | **Consumer ethnocentrism**  **Social identity conflict framing**  **Collective compensation** | **Y** | **Consumer reactions: Consumer anger**  **Consumer forgiveness**  **Willingness to purchase**  **Brand reputation**  **Net brand value**  **Brand satisfaction** |

**Table S2** Brand Origin and Consumer Attitudes

|  | **Context in Which the Domestic vs. Foreign Brand Was Used** | | |  |  |
| --- | --- | --- | --- | --- | --- |
| **Reference** | **Independent variable** | **Dependent variable** | **Moderating variable** | **Country** | **Relationship** |
| Balabanis & Diamantopoulos, 2004 |  | X |  | U.K. | favorable |
| Fischer et al., 2022 | X |  |  | U.S. Germany South Korea | overall favorable, moderated by regulatory focus and ethnocentrism |
| Shimp & Sharma, 1987 |  |  | X | U.S. | favorable |
| Zhou, Yang, & Hui, 2010 | X |  |  | China | favorable |
| Dimitriadou et al., 2019 |  | X |  | Greece | favorable |
| Van Ittersum & Wong, 2010 |  |  | X | Netherlands France U.K. Italy Greece | favorable |
| Swoboda, Pennemann, & Taube, 2012 |  |  | X | China | favorable |
| Özsomer, 2012 | X |  |  | Turkey Singapore Denmark | favorable |
| Riefler, 2012 |  | X |  | Austria | favorable |
| Balabanis & Diamantopoulos, 2011 | X |  |  | U.K. | favorable |
| He & Wang, 2015 |  | X |  | China | favorable |
| Bernard et al., 2020 |  |  | X | France | favorable |
| Peris et al., 1993 | X |  |  | U.K. Spain | favorable |
| Davvetas & Halkias, 2019 | X |  |  | A central European country | favorable |
| Rawwas, Rajendran, & Wuehrer, 1996 |  |  | X | Austria | overall favorable, moderated by nationalism and worldmindedness |
| Davvetas et al., 2023 |  | X |  | Austria  India | favorable |

**Study 1 – Robustness checks**

We obtained anger ratings using IBM Watson, an artificial intelligence tool trained to detect, classify, and quantify emotions in vocabulary datasets, even in informal conversations with emoticons or slang (Pitt et al., 2018). Using a machine learning algorithm, IBM Watson detects distinct emotions in textual documents and produces anger scores (i.e., higher values indicate greater likelihood that the tweet expresses anger). IBM Watson has been extensively used in science (e.g., Fleming, 2018) and marketing (Huang & Rust, 2021; Schlegelmilch et al., 2022) as an automated human interface tool for language, speech, vision, and decision-making (Balducci & Marinova, 2018; Yadav & Pavlou, 2020).

The results show a significant interaction between transgressive brand origin (domestic vs. foreign) and time (before vs. pooled short- and long-after) (*b*3 = 1.19, *p* < .001) that persists upon inclusion of controls. Planned contrasts show a significant increase in anger before versus after the scandal for domestic consumers (Mbefore = 15.68, SD = 15.06; Mafter = 16.60, SD = 17.04; *p* < .001) but not for foreign consumers (*p* = .233). We repeated the analysis focusing only on short-term effects. We find a significant interaction (*b*3 = 0.90, *p* < .001) between brand origin and time (before vs. three months after) that persists upon inclusion of controls. Planned contrasts show a significant increase in anger for domestic consumers (Mbefore = 15.68, SD = 15.06; Mafter = 16.60, SD = 17.06; *p* < .001), but no change for foreign ones (*p* = .908). Finally, we tested long-term effects. The results show a significant interaction (*b*3 = 2.13, *p* < .001) between brand origin and time (before vs. 15 months after) that persists upon inclusion of controls. Planned contrasts show a significant increase in anger for domestic consumers (Mbefore = 15.68, SD = 15.06; Mafter = 16.61, SD = 17.01; *p* < .001) and a significant decrease for foreign ones (Mbefore = 16.24, SD = 15.07; Mafter = 15.04, SD = 15.93; F = 14.10, *p* < .001).

Subsequently, we repeated the analyses using the Forgiveness LIWC22 dictionary (vanOyen Witvliet et al., 2010) as our dependent variable (M = 0.15, SD = 1.06). We have used the Forgiveness LIWC22 dictionary from Witvliet et al. (2010) that includes 18 word stems (e.g., altruism, amend*, compassion*, empath*, forgave, forgiv*, love*, loves*, loving*, merciful*, mercy*, sympath*). Our LIWC forgiveness word dictionary was: altruism, amend*, compassion*, empath*, forgave, forgiv*, love*, loves*, loving*, merciful*, mercy*, sympath*, appreciativ*.  This allowed us to obtain a score on frequency of words in tweets related to forgiveness, which we have used as our alternative dependent measure (M = 0.15, SD = 1.06).

The results show a significant interaction between transgressive brand origin and time (before vs. after) (*b*3 = –0.16, *p* < .001) that persists after we included controls. Planned contrasts show a significant drop (delta = –0.117) in forgiveness before and after the domestic brand scandal (95% CI = –0.172, –0.063; *p* < .001). In line with our predictions, the drop in forgiveness is steeper in the domestic (vs. foreign) market. Using the pre-transgression period as a control condition, we find a significant interaction between brand origin and time (short-term: *b*3 = –0.162, *p* < .001; long-term: *b*3 = –0.159, *p* < .001).

Additionally, analyzed the data using sentiment scores with the *sentimentr* package in R, as suggested in Moradi et al. (2023). The results show a significant interaction between transgressive brand origin and time (long term after vs. before) (*b*3 = –0.06, *p* < .001). Planned contrasts show a significant difference (delta = –0.06; 95% CI = –0.172, –0.063; *p* < .001) in sentiment in the long-term after between the domestic and the foreign market. In line with our predictions, using the pre-transgression period as a control condition, we find a significant interaction between brand origin and long-term after: *b*3 = –0.159, *p* < .001) but we could not find a significant effect comparing before with short-time after, in this case.

**Study 2 – Robustness Checks**

**Regression discontinuity analysis**

**Table S3.** Short-term and long-term effects of domestic brand transgressions

|  | Mean of Squared Root Error | | DID coefficient | |
| --- | --- | --- | --- | --- |
|  | Net Reputation | Net Value | Net Reputation | Net Value |
| Event  (15 Sept 2015) | 3.97 | 3.97 | –12.21***  (0.49) | –5.13***  (0.37) |
| **Event + 5 days**  **(20 Sept 2015)** | 3.83 | **2.98** | –11.91***  (0.46) | **–5.15*****  **(0.36)** |
| **Event + 10 days**  **(25 Sept 2015)** | **3.76** | 2.99 | **–11.99*****  **(0.45)** | –5.14***  (0.36) |
| Event + 15 days  (30 Sept 2015) | 3.93 | 3.05 | –12.13***  (0.47) | –5.31***  (0.36) |
| Event + 20 days  (05 Oct 2015) | 4.09 | 3.09 | –12.21***  (0.49) | –5.38***  (0.37) |

Note: in bold the days where the mean of squared root error is the lowest

**Fig S1 Model-free evidence**

**A: Model-free evidence of the changes in brand reputation**

**B: Model-free evidence of the changes in net brand value**

**Changes in consumer metrics: purchase intentions and brand satisfaction.** We used data acquired from YouGov on purchase intentions and brand satisfaction following the suggested method of Colicev et al. (2018) regarding VW (i.e., treatment firm) and BMW (i.e., control firm) in the United States and Germany for a period ranging from one year before (i.e., September 15, 2014) the emissions scandal (i.e., September 15, 2015) to three years after the scandal (i.e., September 15, 2018). The data comprised 5,848 daily observations. We have not included brand awareness in the analyses, but are happy to report that too. The reason for that is because we naturally expect brand awareness to actually increase after the transgression, given the media coverage of the event which, however, does not necessarily reflect a more positive consumer response, simply greater awareness of the brand. A graphical illustration below of model-free evidence shows a visible difference in purchase intentions and brand satisfaction for the domestic market versus the foreign market after the brand transgression.

**Figure S2a** Model-free evidence of the changes in brand satisfaction

**Figure S2b** Model-free evidence of the changes in purchase intentions

We regressed brand satisfaction on the variable indicating the transgression event (before vs. after the transgression), on the brand (transgressive vs. nontransgressive), on the market (domestic vs. foreign), on the three-way interaction term between these variables, on the interaction term between the brand and the period (i.e., using a DID estimate), on the interaction term between the brand and the market (our main focus), and on the interaction between the market and the period. The results reveal a three-way interaction between the period (before vs. after the transgression), the brand (transgressing vs. control), and the market (domestic vs. foreign) on brand reputation (b = –8.54, SE = 0.35, *p* < .001). Hence, compared with the control (i.e., the non-transgressive brand), the transgressive brand experienced a significantly steeper decrease in brand reputation after the transgression in the domestic (vs. foreign) market. The estimates were significant and negative in year 1 (DID = –6.11, *p* < .001), year 2 (DID = –9.23, *p* < .001), and year 3 (DID = –10.06, *p*< .001) after the transgression in the domestic market.

**Figure S3**

The results replicate overall for purchase intentions, revealing a three-way interaction between the period (before vs. after the transgression), the brand (transgressing vs. control), and the market (domestic vs. foreign) on brand reputation (b = –3.25, SE = 0.19, *p* < .001). Hence, compared with the control (i.e., the non-transgressive brand), the transgressive brand experienced a significantly steeper decrease in brand reputation after the transgression in the domestic (vs. foreign) market. The estimates were significant and negative in year 1 (DID = -2.59, *p* < .001), year 2 (DID = –3.63, *p* < .001), and year 3 (DID = –3.46, *p*< .001) after the transgression in the domestic market.

**Figure S4**

**Change in purchase intentions and brand satisfaction across markets**

**Figure S5**

**Effects of brand transgressions on domestic vs. foreign stock market.** we have used data from the Investors Relations Fact Sheet of the Volkswagen Group website on the last 10 years. The data that they provide include stock prices in a domestic market (Xetra), European market (FTSE and Euro Stoxx), and US market (S&P 500 and Dow Jones). This allowed us to (1) run a regression discontinuity model around the transgression date in all of these markets and test the drop in the domestic versus foreign close (Europe) and foreign far (US) markets, and (2) compare the drop in the domestic vs. foreign markets with a MANOVA, given the existence of 5 proxies for the dependent variable (market performance) and the same independent variable (transgression event). We have logged the stock prices given the variations in numbers across the 5 indices.

**Figure S6**

Considering the period from the month before to the month after the transgression, the results of the MANOVA suggest a significant drop in stock prices in the domestic market (delta = -0.32, t = -8.98, *p* < .001) and a significant drop in the European market, but of smaller scale (delta = -0.03, t = -3.51, *p* < .001). A posthoc test of the two drops suggests that the drop in the domestic market (Germany) is significantly larger than that in the European market (F = 14.02, *p* = .002). The change in the other foreign markets was not significant. The results replicate if we consider the period 2 weeks before and after.

**Figure S7**


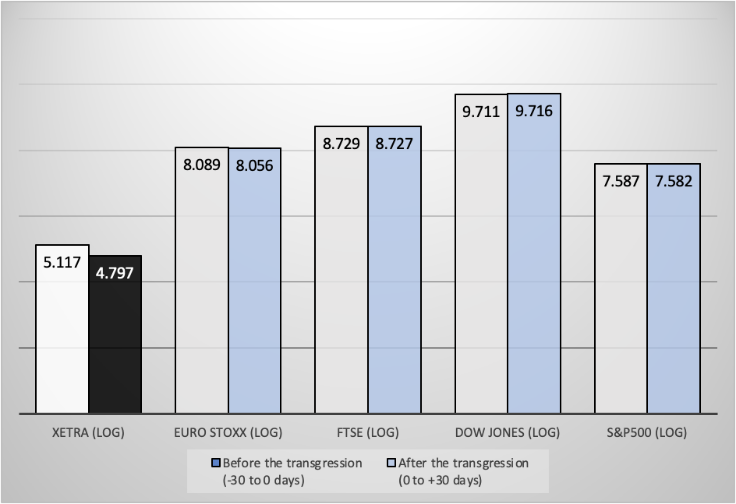


Below are the graphs of the *rdplot* and the summary graph of the changes in average stock prices per each market in the period before and after the transgression of VW:

**Figure S8**

**The role of media coverage.** Given that media coverage during the investigation period could have played a role in our findings, we have repeated the analyses controlling for this element. Specifically, we have taken as proxy for media coverage the number of Google searches in the category news for VW and BMW in Germany and the United States for the period between 15 September 2014 and 15 September 2018 (i.e., from one year before to 3 years after the VW scandal). We have rerun the analyses including number of news searches as a covariate. Results suggest that while media coverage has a negative effect on net brand reputation (b = -0.007, SE = 0.004, t = -1.97, *p* = .049) and net brand value (b = -0.007, SE = 0.003, t = -2.50, *p* = .012), results persist upon its inclusion. Results suggest a negative and significant interaction between brand transgression (vs. control), domestic (vs. foreign) market, and time (before vs. after the transgression) on net brand reputation (b = -11.70, SE = 0.48, t = -24.24, *p* < .001) and on net brand value (b = -5.16, SE = 0.37, t = -14.00, *p* < .001).

**Brand reputation as an antecedent**. Previous research has identified brand reputation as an antecedent to consumer responses to brand actions (e.g., Mafael et al. 2022). To address this concern, we have created a variable that represents lagged reputation by a month time. We have initially regressed purchase intentions in the domestic market just for the transgressive brand on the interaction term composed by time (before vs. after the transgression) and continuous values of lagged reputation, and these separate constructs. The results suggest a positive and significant interaction between time and lagged reputation (b = 0.07, SE = 0.02, t = 4.17, *p* < .001), suggesting that after (vs. before) the transgression, higher ratings of previous reputation increase purchase intentions, hence, smoothening the negative effect of the transgression on purchase intentions. Similarly, we regressed brand satisfaction in the domestic market just for the transgressive brand on the interaction term composed by time (before vs. after the transgression) and continuous values of lagged reputation, and these separate constructs. The results suggest a positive and significant interaction between time and lagged reputation (b = 0.09, SE = 0.03, t = 3.13, *p* = .002), suggesting that after (vs. before) the transgression, higher ratings of previous reputation increase brand satisfaction (hence, mitigate the negative effect of the transgression).

**Figure S9**

Moreover, we repeated the analyses on brand value and brand reputation, controlling for the previous reputation the brand, using its value lagged by 30 days. Results show a significant and positive effect of previous reputation on brand value (b = 0.15, SE = 0.01, t = 17.89, *p* < .001) and on brand reputation (b = 0.22, SE = 0.01, t = 20.22, *p* < .001). Including previous reputation as control variable does not affect the previous results. We still find a significant 3-way interaction between time (before vs. after the transgression), brand (transgressive vs. not), and market (domestic vs. foreign), both on brand value (b = -3.60, SE = 0.37, t = -9.75, *p* < .001) and on brand reputation (b = -9.55, SE = 0.48, t = -19.92, *p* < .001).

**Controlling for brand ownership.** As a further statistical test, we regressed brand reputation and brand value on the periods (before vs. after the transgression), the brand (transgressive vs. nontransgressive), the market (domestic vs. foreign), the three-way interaction of these variables, the interaction between the brand and the period (i.e., using a DID estimate), the interaction between the brand and the market (our main focus), and the interaction between the market and the period, controlling also for whether the respondents are current customers of the brand. The results reveal a three-way interaction between the period (before vs. after the transgression), the brand (transgressing vs. control), and the market (domestic vs. foreign) on brand reputation (b = –11.76, SE = 0.48, *p* < .001). Compared with the control brand, the transgressive brand experienced a significantly steeper decrease in brand reputation after the transgression in the domestic (vs. foreign) market. The estimates were significant and negative in year 1 (DID = –9.53, *p* < .001), year 2 (DID = –12.33, *p* < .001), and year 3 (DID = –13.09, *p* < .001) after the transgression in the domestic market. The results replicate for years 1, 2, and 3 for net brand value as well. Specifically, results reveal a three-way interaction between the period (before vs. after the transgression), the brand (transgressing vs. control), and the market (domestic vs. foreign) on brand value (b = –5.11, SE = 0.36, *p* < .001). Additionally, compared with the control brand, the transgressive brand experienced a significantly steeper decrease in brand reputation after the transgression in the domestic (vs. foreign) market. The estimates were significant and negative in year 1 (DID = –2.91, *p* < .001), year 2 (DID = –5.96, *p* < .001), and year 3 (DID = –6.25, *p* < .001) after the transgression in the domestic market.

**Study 3: Experimental Manipulations**

**Brand origin manipulation**

***Domestic brand condition***

ABC is a BRITISH brand that operates in the cartridge production sector. Here is some information on the brand:

Available in many countries around the world including (among others) the US, UK, and South Korea.

Company Headquarters: London, UK

Founded in: Manchester, UK

Name of the Founder: Henry Powell

***Foreign brand condition***

ABC is a SOUTH KOREAN brand that operates in the cartridge production sector. Here is some information on the brand:

Available in many countries around the world including (among others) the US, UK, and South Korea.

Company Headquarters: Seoul, South Korea

Founded in: Busan, South Korea

Name of the Founder: Seo-Jun Gwak (곽서준)

**Transgression manipulation (common across conditions)**

Last week, it was released that ABC had engaged in a crisis. The crisis involved a number of sexual harassment cases towards numerous company employees. In particular, the firm was investigated and the authorities found evidence that employees in leading roles engaged in a number of unwelcome sexual advances, requests for sexual favors, and other verbal or physical conduct of a sexual nature, the rejection of which led to threats on the employment continuity. Instead of harshly acting upon the numerous complaint files, the company had decided to silently close the cases.

**Posthoc check of brand reputation**

We have conducted a posthoc study where we test perceptions of participants regarding ABC. Specifically, we reached out to 200 participants on Prolific, all UK nationals and residents, 20 of them failed the first attention check (i.e., the extent to which they were going to pay attention to the study), so we collected data from 180 of them (Mage = 41.57, SD = 14.23). Participants were randomly exposed to either the ABC description from the UK or from South Korea, as in the main study, followed by the scale on perceived reputation of the brand, using the adapted scale from Johnson et al. (2019), ( = 873, M = 4.43, SD = 0.80). Ruling out a potential effect of country of origin (UK vs. Korea) on brand reputation, we found no significant differences between participants in the domestic brand condition on brand reputation than those in the foreign brand condition (Mdomestic = 4.45, SD = 0.68 vs. Mforeign = 4.42, SD = 0.91; *t* = 0.32, *p* = .752).

**Table S4** Effects on Willingness to Purchase

| **Effect** | **Mean estimate** | **SE** | **t (p)** | **Lower 95% CI** | **Upper 95% CI** |
| --- | --- | --- | --- | --- | --- |
| DV: Willingness to purchase | | | | | |
| Domestic origin > SI Threat (a1 path) | 1.36 | .193 | 7.05 (.000) | .980 | 1.742 |
| Domestic origin > Protection (a2 path) | .106 | .127 | .832 (.407) | -.145 | .356 |
| SI Threat > DV (b1 path) | -.272 | .052 | -5.20 (.000) | -.375 | -.169 |
| Protection > DV (b2 path) | .896 | .080 | 11.27 (.000) | .739 | 1.053 |
| Domestic origin > SI Threat > DV (a1×b1) | -.370 | .092 | NA (bootstrap estimate) | -.554 | -.197 |
| Domestic origin > Protection > DV (a2×b2) | .095 | .118 | NA (bootstrap estimate) | -.130 | .338 |
| Domestic origin > DV(Direct) | .100 | .152 | .656 (.513) | -.200 | .399 |
| Domestic origin > DV (Total) | -.176 | .188 | -.935 (.351) | -.547 | .195 |

Note: transgression severity included as control (results remain robust with and without it)

**Study 3b: The mediating role of social identity threat**

Study 3b aims to rule out alternative explanations of the origin-backfire effect. Specifically, we test whether the effect can be explained by (1) the five MFT dimensions, (2) transgression incongruity, (3) communal/exchange relationship norm violation, (4) broken consumer–brand connection, and (5) psychological proximity of the transgression. We also test the mediating role of social identity threat on consumer emotions. Finally, we assess the mediating role of social identity threat in the context of a performance transgression.

**Method**

We recruited 195 participants of an online consumer panel in the United Kingdom (Prolific Academic; Mage = 36.7 years, SD =10.5; 70.8% female) in exchange for monetary compensation to incentivize participation. All participants were U.K. residents and nationals. We excluded participants who failed attention checks and had missing responses.

The session started with a presentation of a brand in the fashion industry. Participants read about a brand called ABC that used of toxic materials in clothing production. We manipulated brand origin in the same way as in Study 3 and randomly allocated participants into a domestic brand or a foreign brand condition (see the Web Appendix). After exposure to the manipulations, participants completed measures of the dependent variables (forgiveness, willingness to purchase), the hypothesized mediator (social identity threat)[[1]](#footnote-2), the alternative mediators (moral foundations dimensions, self–brand relationship, incongruity, psychological closeness with the brand, moral normal violations), emotions (anger, disappointment, embarrassment, shame), controls (transgression severity), and manipulation checks. Finally, participants provided demographic information and were debriefed and thanked.

**Analysis and results**

*Manipulation checks.* Participants in the domestic brand condition scored higher on a scale of domestic brand origin than those in the foreign brand condition (Mdomestic = 6.12, SD = 1.00 vs. Mforeign = 1.51, SD = 1.09; t = 30.86, *p* < .001). Participants perceived the crisis scenario as equally credible across conditions (Mdomestic = 5.36, SD = 1.40 vs. Mforeign = 5.46, SD = 1.10; t = –0.57, *p* = .596). The transgression was judged as equally severe across conditions (Mdomestic = 5.73, SD = 1.02 vs. Mforeign = 5.82, SD = 1.11; t = –0.57, *p* = .569).

*Simple mediation tests.* We estimated 10 single mediation models with one variable serving as the mediator at a time. In all models, the independent variable is the experimental condition (brand origin: 0 = foreign, 1 = domestic), and the dependent variable is forgiveness. The only model that yielded significant indirect effects is the social identity threat model (ab = –.334, SE = .09, 95% CI = [–.52, –.18]). None of the other models yielded significant mediation (95% CIs: care/harm = [–.19, .06], fairness/justice = [–.14, .08], authority/subversion = [–.14, .02], purity/degradation = [–.19, .08], incongruity = [–.01, .08], communal relationship norm violation = [–.03, .02], exchange relationship norm violation = [–.02, .03], broken self–brand connection = [–.16, .32], psychological proximity = [–.05, .03]).[[2]](#footnote-3) The results replicate when we use willingness to purchase as the dependent variable.

*Multiple parallel mediation test.* We estimated a multiple parallel mediation model with all 10 mediators included simultaneously. The only mediator obtaining a significant indirect effect is social identity threat (ab = –.157, SE = .07, 95% CI = [–.30, –.04]). None of the other variables mediated the effect (95% Cis: care/harm = [–.08, .02], fairness/justice = [–.04, .02], authority/subversion = [–.05, .02], purity/degradation = [–.07, .02], incongruity = [–.01, .06], communal relationship norm violation = [–.04, .04], exchange relationship norm violation = [–.05, .05], broken self–brand connection = [–.10, .05], psychological proximity = [–.03, .02]). The results replicate for willingness to purchase.

*Consumer emotions.* We estimate four single mediation models that substitute forgiveness with four negative emotions consumers typically experience after brand transgressions. Social identity threats mediate the effect of brand origin on all four emotions (anger: [.27, .77], shame: [.31, .87], disappointment: [.09, .39], embarrassment: [.25, .77]).

**Discussion**

Study 3b supports H2 by replicating the mediating role of social identity threat in cases of domestic performance transgressions. The findings rule out alternative explanations for the origin-backfire effect. Study 3 also shows that that domestic transgressions cause stronger emotional reactions (i.e., anger, shame, disappointment, embarrassment) than foreign ones.

**Brand origin manipulation**

***Domestic brand condition***

ABC is a BRITISH brand that operates in the fashion industry in several countries. ABC sells male and female clothing, accessories, and sports equipment. Here is some information on the brand:

Available in many countries around the world including (among others) the US, UK, and South Korea.

Company Headquarters: London, UK

Founded in: Manchester, UK

Name of the Founder: Henry Powell

***Foreign brand condition***

ABC is a SOUTH KOREAN brand that operates in the fashion industry in several countries. ABC sells male and female clothing, accessories, and sports equipment. Here is some information on the brand:

Available in many countries around the world including (among others) the US, UK, and South Korea.

Company Headquarters: Seoul, South Korea

Founded in: Busan, South Korea

Name of the Founder: Seo-Jun Gwak (곽서준)

**Transgression manipulation (common across conditions)**

Last week, it was released that ABC had engaged in a brand crisis. The crisis involved a number of cases of BRITISH customers of the brand reporting rashes, eczema, and other similar skin conditions after wearing the products of ABC. In particular, the company was investigated and the BRITISH authorities found evidence that ABC's products contained lead, chromium, phthalates, and PFAS materials, which are cancerogenic and have been linked to severe skin reactions. The company has not yet provided any official communications regarding the case.

**Measurement of alternative mediators**

In this study, beyond social identity threat, we also include measures of the following alternative mediators: (1) the *five dimensions of Moral Foundations Theory* (MFT; Graham et al., 2009) which were proposed by Reviewer 1 (care/harm, fairness/justice, in-group loyalty/betrayal, authority/subversion, and sanctity/degradation)*,* (2) *perceived transgression incongruity* (adapted from Halkias & Kokkinaki, 2014), (3) *communal/exchange relationship norm violation* (adapted from Johnson & Grimm, 2010; Clarck & Mills, 2012), (4) *broken consumer-brand connection* (adapted from Escalas & Bettman, 2003), and (5) *psychological proximity/closeness of the transgression* (self-developed). The items used to measure these constructs are presented below (all measured in 7-point scales).

**Moral Foundations Theory Dimensions**

To which extent do you think that the actions of ABC...

**Care/Harm (α = .562)**

- *caused harm to people*
- *made people suffer emotionally*
- *treated people violently*

**Fairness/Justice (α = .707)**

- *treated some people differently than others*
- *denied the rights of people*
- *were unfair to people*

**Ingroup loyalty/betrayal (α = .772)**

- *betrayed the people of their country*
- *were done by people in your own country*
- *showed disloyalty to my country's people*

**Authority/Subversion (α = .519)**

- *were done by people with similar rank or status to mine*
- *did not fulfil the duties of ABC's role to its superiors*
- *did not show respect to legitimate authority*

**Purity/Degradation (α = .889)**

- *were disgusting*
- *were impure and indecent*
- *were unnatural and degrading*

**Perceived Transgression (In)congruity** **(α = .747)**

To me, the actions of ABC feel: *expected/unexpected, relevant/irrelevant, unsurprising/surprising, natural/strange, likely/unlikely, possible/impossible, typical for companies like ABC/atypical for companies like ABC*.

**Violation of communal relationship norms (α = .944)**

To what extent did the actions of ABC feel like a violation from: *a brand you care about*; *a brand you are emotionally connected with*; *a brand you treat as a close partner*.

**Violation of exchange relationship norms (α = .813)**

To what extent did the actions of ABC feel like a violation from: *a brand with which I am on an "quid pro quo" relationship with*; *a brand I am in a purely economic transaction with*; *a brand I treat as a business partner*.

**Broken self-brand connection (α = .895)**

To which extent do you agree with the following statements: *ABC does not reflect who I am anymore*; *ABC cannot help me become the person I want to be anymore*.

**Psychological closeness/proximity of the transgression (α = .958)**

To me, the actions of ABC felt like happening: *close to me/far from me*; *next to me/away from me*; *in my proximity/outside my proximity*; *in close distance/in remote distance.*

**Table S5** Parallel Mediation results

| **Multiple parallel mediators** | **a-path**  **(p-value)** | **b-path**  **(p-value)** | **Indirect (a×b)** | **95% Indirect CI** | **P-DIFF** |
| --- | --- | --- | --- | --- | --- |
| Care/Harm | .094 (.342) | -.281 (.000) | -.026 | [-.087, .027] | 22.93 |
| Fairness/Justice | .081 (.581) | -.016 (.700) | -.001 | [-.018, .015] | 1.13 |
| In-group loyalty/betrayal | .422 (.001) | .041 (.354) | .017 | [-.024, .059] | -14.98 |
| Authority/Subversion | .084 (.424) | -.061 (.148) | -.005 | [-.021, .013] | 4.42 |
| Purity/Degradation | .042 (.763) | -.073 (.107) | -.003 | [-.027, .020] | 2.65 |
| Congruity | .049 (.615) | .040 (.339) | .002 | [-.011, .015] | -1.68 |
| Communal relationship norm violation | .110 (.529) | -.046 (.248) | -.005 | [-.027, .017] | 4.37 |
| Exchange relationship norm violation | .111 (.440) | .080 (.093) | .009 | [-.019, .036] | -7.66 |
| Broken self-brand connection | -.047 (.734) | -.110 (.000) | .005 | [-.027, .036] | -4.44 |
| Psychological closeness/proximity | -.041 (.788) | .056 (.034) | -.002 | [-.022, .014] | 1.99 |
| **Social Identity Threat** | **.598 (.000)** | **-.177 (.000)** | **-.106** | **[-.175, -.033]** | **91.26** |

**Study 4a: Experimental Manipulations**

**Brand origin manipulation**

***Domestic brand condition***

ABC is a BRITISH brand that operates in the bicycle production sector in the UK. Here is some information on the brand:

Available in the UK

Company Headquarters: London, UK

Founded in: Manchester, UK

Name of the Founder: Henry Powell

***Foreign brand condition***

ABC is a SOUTH KOREAN brand that operates in the bicycle production sector in the UK. Here is some information on the brand:

Available in the UK

Company Headquarters: Seoul, South Korea

Founded in: Busan, South Korea

Name of the Founder: Seo-Jun Gwak (곽서준)

**Transgression manipulation (common across conditions)**

Last week, it was released that ABC had engaged in a brand crisis. The crisis involved significant payment gaps between male and female employees involved in the production of bicycles. In particular, the company was investigated, and the authorities found evidence that female employees were paid on average 20 percent less than their male counterparts, despite being equally qualified. As a result, the company has been accused of sexual discrimination by the authorities.

**Social identity conflict framing manipulation**

The event has attracted the interest of the national press, which asked the company for a comment. The company has issued a press release apologizing for the event and attributing it to the increased competition it faces from its key ***foreign (non-British) / British*** competitor in the U.K. bicycle manufacturing market. Specifically, the CEO argued that the competition from this ***foreign firm / domestic firm*** has seriously put in risk the survival of the company. The CEO added that they found themselves with no other option than to do so, in order to lower their production costs, given the large percentage of female workforce in the company.

**Fig S10** Floodlight graph (Consumer Ethnocentrism)


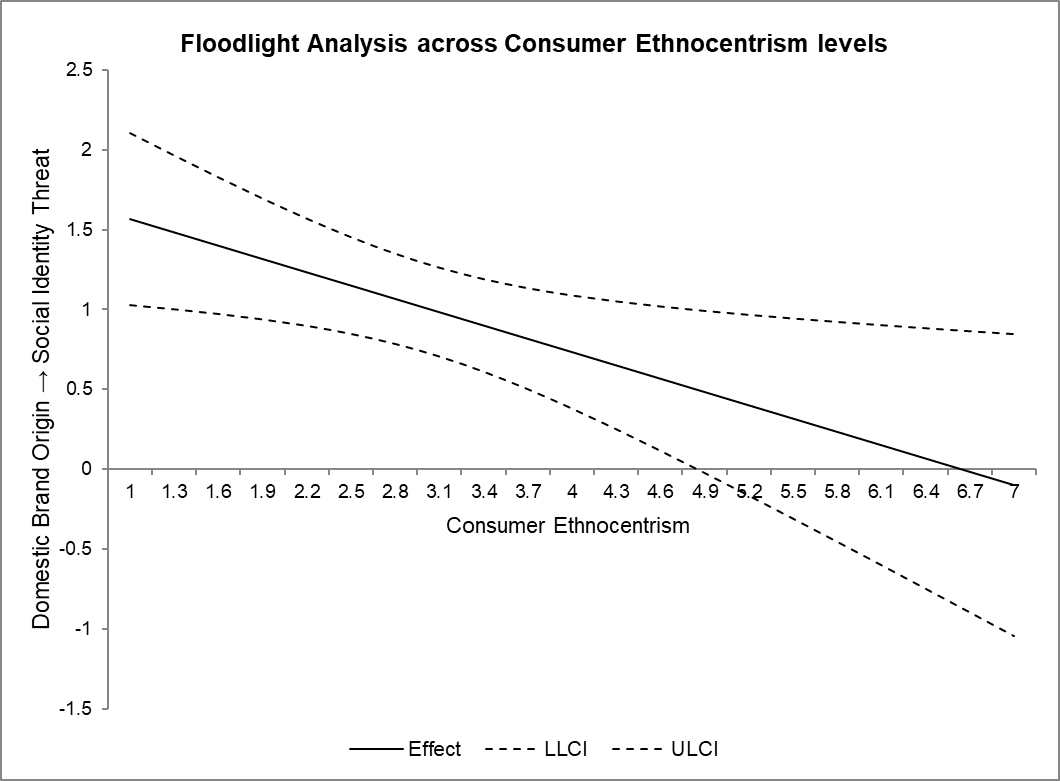


**Effects on Willingness to Purchase**

**Table S6** Simple (no moderators) mediation test (Model 4)

| **Effect** | **Mean estimate** | **SE** | **t (p)** | **Lower 95% CI** | **Upper 95% CI** |
| --- | --- | --- | --- | --- | --- |
| DV: Willingness to purchase | | | | | |
| Domestic origin > SI Threat (a path) | 1.13 | .150 | 4.06 (.001) | .857 | 2.470 |
| SI Threat > DV (b path) | -.260 | .045 | -5.75 (.000) | -.348 | -.171 |
| Domestic origin > SI Threat > DV (Indirect) | -.269 | .068 | NA (Bootstrap only) | -.414 | -.147 |
| Domestic origin > DV (Direct) | .249 | .139 | 1.79 (.074) | -.024 | .522 |
| Domestic origin > DV (Total) | -.020 | .136 | -.149 (.882) | -.287 | .250 |

Note: gender and value importance included as controls (results remain robust with and without controls)

**Table S7** Moderation by Threat (Intergroup vs. Intragroup) (Model 7)

| **Threat type** | **Effect** | **SE** | **Lower 95% CI** | **Upper 95% CI** |
| --- | --- | --- | --- | --- |
| Conditional indirect effects | | | | |
| Intra-group (0) | -.163 | .068 | -.313 | -.045 |
| Inter-group (1) | -.407 | .094 | -.602 | -.086 |
| Direct effect | | | | |
| (Domestic Origin > WPurchase) | .242 | .138 | -.030 | .513 |

Note: gender, value importance, CET included as controls (results remain robust with and without controls)
Moderated Mediation Index [MMI] = -.151, SE = .075, 95%CI = [-.309, -.018]

**Table S9** Moderation by Consumer Ethnocentrism (Model 7)

| **Consumer ethnocentrism (M±SD)** | **Effect** | **SE** | **Lower 95% CI** | **Upper 95% CI** |
| --- | --- | --- | --- | --- |
| Conditional indirect effects | | | | |
| Low (1.79) | -.354 | .096 | -.557 | -.185 |
| Mean (3.02) | -.264 | .067 | -.405 | -.146 |
| High (4.26) | -.174 | .062 | -.306 | -.067 |
| Direct effect | | | | |
| (Domestic Origin > WPurchase) | .254 | .139 | -.019 | .528 |

Note: gender, value importance, framing included as controls (results remain robust with and without controls)
Moderated Mediation Index [MMI] = .073, SE = .037, 95% CI = [.007, .151]

**Table S10** Double moderation by Threat (Intergroup vs. Intragroup) and CET (Model 9)

| **Threat type** | **CET (M±SD)** | **Effect** | **SE** | **Lower 95% CI** | **Upper 95% CI** |
| --- | --- | --- | --- | --- | --- |
| Conditional indirect effects | | | | | |
| Intra-group (0) | Low (1.79) | -.241 | .090 | -.442 | -.087 |
| Intra-group (0) | Mean (3.02) | -.154 | .064 | -.297 | -.044 |
| Intra-group (0) | High (4.26) | -.067 | .064 | -.201 | .052 |
| Inter-group (1) | Low (1.79) | -.466 | .117 | -.708 | -.254 |
| Inter-group (1) | Mean (3.02) | -.379 | .091 | -.570 | -.213 |
| Inter-group (1) | High (4.26) | -.292 | .083 | -.471 | -.148 |
| Direct effect | | | | | |
| (Domestic Origin > WPurchase) | | .249 | .139 | -.024 | .522 |

Note: gender and value importance included as controls (results remain robust with and without controls)

**Study 4b: Experimental Manipulations**

**Brand transgression**

In this part of the study, we are interested in your opinions about a brand situation that we are about to describe. To ensure the privacy of the brand, we will call it brand ABC. ABC is a BRITISH brand that operates in the bicycle production sector in the UK. Here is some information on the brand:

Available in: UK

Company Headquarters: London, UK

Founded in: Manchester, UK

Name of the Founder: Henry Powell

Last week, it was released that ABC had engaged in a brand crisis. The crisis involved a number of sexual harassment cases towards numerous company employees in the UK. In particular, the company was investigated, and the authorities found evidence that employees in leading roles engaged in a number of unwelcome sexual advances, requests for sexual favors, and other verbal or physical conduct of a sexual nature, the rejection of which led to threats on the employment continuity.

**Individual compensation**

The event has attracted the interest of the national press, which asked the company for a comment. The company has issued a press release apologizing for the event. Apart from apologizing, the company announced that they will be giving a sum of £100,000 for the purpose of compensating the victims involved in the ABC sexual harassment cases. This amount will be directed to the mental health and physical wellbeing of the affected employees. The company will also start an internal training program targeted at its own employees on matters of professional conduct and reporting of incidents of inappropriate workplace behavior.

**Collective compensation**

The event has attracted the interest of the national press, which asked the company for a comment. The company has issued a press release apologizing for the event. Apart from apologizing, the company announced that they will be giving a sum of £100,000 for the purpose of founding a non-profit organization called "Harassment-free UK". The mission of this organization will be to support the mental health and physical wellbeing of victims of sexual harassment across the UK. "Harassment-free UK" will also launch a UK-wide training program targeted at British companies on matters of professional conduct and reporting of incidents of inappropriate workplace behavior.

**Control**

The event has attracted the interest of the national press, which asked the company for a comment. The company has issued a press release apologizing for the event.

**Studies 3, 3b, 4a & 4b: Construct Measurement and Psychometric Properties**

**Table S11** Construct Measurement and Psychometric Properties

| **Items** | **Study 3** | **Study 3b** | **Study 4a** | **Study 4b** |
| --- | --- | --- | --- | --- |
| ***Social identity threat***  The company ABC represents a threat to British citizens.  The company ABC gives a bad name to British people.  The company ABC defames what Britain stands for.  The company ABC disrespects the values of British people. | α = .862  CR = .866  AVE = .622 | α = .867  CR = .873  AVE = .634 | α = .895  CR = .865  AVE = .684 | α = .877  CR = .885  AVE = .661 |
| ***Willingness to forgive*** (Tsarenko & Tojib, 2015)  I feel resentful toward this brand. (R)  I become upset when I think about the actions of this brand. (R)  I forgive this brand. | α = .803  CR = .791  AVE = .563 | α = .742  CR = .726  AVE = .473 | α = .848  CR = .855  AVE = .663 | α = .826  CR = .835  AVE = .630 |
| ***Willingness to purchase*** (Estes et al., 2018)  Despite all, I would consider purchasing this brand.  Despite all, I would consider buying this brand next time I go shopping. | α = .965  CR = .965  AVE = .933 | α = .949  CR =  AVE = | α = .985  CR = .985  AVE = .971 | NA |
| ***In-group protection***  As a British, I believe I should keep supporting brand ABC.  Being British, I should give ABC another chance.  No matter what ABC did, it still feels like one of us.  I feel like it is my duty as a British person to help ABC make up for its mistakes.  Being British, I would embrace ABC despite its flaws. | α = .914  CR = .915  AVE = .685 | NA | NA | NA |
| ***Transgression severity***  How would you describe the transgression of the ABC?   - Mild transgression to severe transgression - Minor transgression to major transgression - Insignificant transgression to significant transgression | α = .949  CR = .951  AVE = .866 | α = .922  CR = .949  AVE = .903 | NA | NA |
| ***Consumer ethnocentrism*** (Verlegh, 2007)  British shouldn’t buy foreign product because this harms the local economy and increases unemployment.  It is not right to purchase foreign products, because jobs are lost in Britain.  A true British should only buy British products.  Even if I had to pay more I would rather buy a British product.  We should purchase British products, otherwise we make other countries rich. | NA | NA | α = .905  CR = .907  AVE = .662 | NA |
| ***Model Fit*** | χ2 = 282.01, df = 109  χ2/df = 2.59  RMSEA = .08  CFI = .95  SRMR = .06 | χ2 = 119.93, df = 48  χ2/df = 2.50  RMSEA = .09  CFI = .95  SRMR = .07 | χ2 = 187.29, df = 59  χ2/df = 3.17  RMSEA = .07  CFI = .97  SRMR = .04 | χ2 = 66.50, df = 13  χ2/df = 5.12  RMSEA = .09  CFI = .97  SRMR = .04 |

Notes: NA: the construct was not measured in the corresponding study; All loadings are significant and exceed conventional thresholds (λ >.50); In Study 4a, the fourth item of Social identity threat was removed due to low loading.

**Web Appendix References**

Aw, E. C. X., & Labrecque, L. I. (2023). Celebrities as brand shields: The role of parasocial relationships in dampening negative consequences from brand transgressions. *Journal of Advertising, 52*(3), 387-405.

Balabanis, G., & Diamantopoulos, A. (2011). Gains and losses from the misperception of brand origin: The role of brand strength and country-of-origin image. *Journal of International Marketing, 19*(2), 95-116.

Balducci, B., & Marinova, D. (2018). Unstructured data in marketing. *Journal of the Academy of Marketing Science, 46*, 557-590.

Bernard, Y., Collange, V., Ingarao, A., & Zarrouk-Karoui, S. (2020). Products labeled as “made in domestic country”: the brand matters*. European Journal of Marketing, 54*(12), 2965-2987.

Chung, E., & Beverland, M. (2006). An exploration of consumer forgiveness following marketer transgressions. *ACR North American Advances.*

Dimitriadou, M., Maciejovsky, B., Wildschut, T., & Sedikides, C. (2019). Collective nostalgia and domestic country bias. *Journal of Experimental Psychology: Applied, 25*(3), 445.

Fleming, N. (2018). How artificial intelligence is changing drug discovery. *Nature, 557*(7706), S55-S55.

He, J., & Wang, C. L. (2015). Cultural identity and consumer ethnocentrism impacts on preference and purchase of domestic versus import brands: An empirical study in China. *Journal of Business Research, 68*(6), 1225-1233.

Huang, M. H., & Rust, R. T. (2021). A strategic framework for artificial intelligence in marketing. *Journal of the Academy of Marketing Science*, *49*, 30-50.

Kim, Y., Park, K., & Stacey Lee, S. (2019). The underdog trap: The moderating role of transgression type in forgiving underdog brands. *Psychology & Marketing, 36*(1), 28-40.

Kuchmaner, C. A., Wiggins, J., & Grimm, P. E. (2019). The role of network embeddedness and psychological ownership in consumer responses to brand transgressions. *Journal of Interactive Marketing, 47*(1), 129-143.

Peris, S. M., Newman, K., Bigne, E., & Chansarkar, B. (1993). Aspects of Anglo-Spanish perceptions and product preferences arising from ‘country of origin’image. *International Journal of Advertising, 12*(2), 131-142.

Pitt, C., Eriksson, T., Dabirian, A., & Vella, J. (2018). Elementary, my dear Watson: the use of artificial intelligence in marketing research: an abstract. In Boundary Blurred: A Seamless Customer Experience in Virtual and Real Spaces: Proceedings of the 2018 Academy of Marketing Science (AMS) Annual Conference 46 (pp. 325-325). Springer International Publishing.

Rawwas, M. Y., Rajendran, K. N., & Wuehrer, G. A. (1996). The influence of worldmindedness and nationalism on consumer evaluation of domestic and foreign products. *International Marketing Review, 13*(2), 20-38.

Ryoo, Y. (2022). Moral credentials versus moral credits: Two paths to consumers’ licensing of brand transgressions. *Journal of Business Research, 146,* 13-31.

Schlegelmilch, B. B., Sharma, K., & Garg, S. (2022). Employing machine learning for capturing COVID-19 consumer sentiments from six countries: a methodological illustration. *International Marketing Review*.

Septianto, F., & Kwon, J. (2022). Too cute to be bad? Cute brand logo reduces consumer punishment following brand transgressions. *International Journal of Research in Marketing, 39*(4), 1108-1126.

Sinha, J., & Lu, F. C. (2016). “I” value justice, but “we” value relationships: Self-construal effects on post-transgression consumer forgiveness. *Journal of Consumer Psychology, 26*(2), 265-274.

Swoboda, B., Pennemann, K., & Taube, M. (2012). The effects of perceived brand globalness and perceived brand localness in China: Empirical evidence on Western, Asian, and domestic retailers. *Journal of International Marketing, 20*(4), 72-95.

Thomas, V. L., & Fowler, K. (2016). Examining the impact of brand transgressions on consumers' perceptions of celebrity endorsers. *Journal of Advertising, 45*(4), 377-390.

Trump, R. K. (2014). Connected consumers' responses to negative brand actions: The roles of transgression self-relevance and domain. *Journal of Business Research, 67*(9), 1824-1830.

Tsarenko, Y., & Tojib, D. (2015). Consumers’ forgiveness after brand transgression: the effect of the firm’s corporate social responsibility and response. *Journal of Marketing Management, 31*(17-18), 1851-1877.

Yadav, M. S., & Pavlou, P. A. (2020). Technology-enabled interactions in digital environments: A conceptual foundation for current and future research*. Journal of the Academy of Marketing Science, 48*, 132-136.

Zhou, L., Yang, Z., & Hui, M. K. (2010). Non-local or local brands? A multi-level investigation into confidence in brand origin identification and its strategic implications. *Journal of the Academy of Marketing Science, 38*, 202-218.

1. We measured social identity threat both at the individual level (e.g., “ABC represents a threat to me as a British citizen”) and at the collective level (e.g., “ABC represent a threat to British citizens”). CFAs indicate that individual and collective social identity threats load on the same factor. The results fully replicate when individual social identity threat is used as a mediator. For consistency purposes across studies, results presented in text refer to collective-level operationalization of social identity threat. [↑](#footnote-ref-2)
2. We find a significant indirect effect of in-group loyalty/betrayal (ab = –.26, 95% CI = [–.39, –.14]). This is in line with our expectations due to the high conceptual and empirical overlap between this MFT dimension and social identity threat (r = .721, *p* < .001). A model including both in-group betrayal and social identity threat as parallel mediators shows a significant indirect effect through social identity threat (ab = –.29, 95% CI = [–.50, –.14]), while the indirect effect through in-group betrayal is nonsignificant (ab = –.06, 95% CI = [–.18, .05]). [↑](#footnote-ref-3)
